1 **Community-orientated primary health care: exploring the interface between community health**  
2 **worker programmes, the health system and communities in South Africa**

3

4 **Authors:** Hlologelo Malatji<sup>a\*</sup>, Frances Griffiths<sup>a,b</sup>, Jane Goudge<sup>a</sup>

5

6 **Affiliations**

7

8 <sup>a</sup> Centre for Health Policy, School of Public Health, University of the Witwatersrand, Johannesburg,  
9 South Africa

10 <sup>b</sup> Warwick Medical School, University of Warwick, United Kingdom

11

12 **\*Corresponding author**

13 Email: [hlologelo.malatji@wits.ac.za](mailto:hlologelo.malatji@wits.ac.za)

14

15

16 **ABSTRACT**

17

18 Due to insufficient number of health workers in low- and middle-income countries, and the evidence  
19 of the benefits of community health workers (CHWs), CHWs are being deployed to provide health care  
20 services to under-served communities. In this article, we explore to what extent a nation-wide CHW  
21 programme in South Africa is attuned to community needs, integrated into the healthcare system and  
22 community structures, and also implemented in accordance with community-orientated primary  
23 health care principles. Using a case study approach, the study was conducted in seven primary  
24 healthcare facilities located in semi-urban and rural areas of Gauteng and Mpumalanga provinces,  
25 South Africa. We collected data using in-depth interviews involving facility managers, CHW supervisors  
26 and community representatives, and focus groups and observations of CHWs. The implementation of  
27 community-orientated community worker programmes remains complex. In the different sites we  
28 studied, there were efforts to integrate the views of stakeholders (e.g., political leaders) into the  
29 implementation of the programmes. However, many residents were more concerned about access to

30 housing that health services delivery issues. The CHW services' were found to be generally  
31 comprehensive, however inefficient training, supervision and mentorship limited their effectiveness.  
32 The multidisciplinary approach to care, as introduced by some sites, helped enhance the knowledge  
33 and skills of some of the CHWs on complex health topics. The roll out of community orientated primary  
34 health care services is crucial in a resource constrained setting like South Africa. Significant socio-  
35 economic issues are barriers to community involvement and the effective provision of services.  
36 Governments need to provide sufficient funds for training, supervision, supplies and remuneration to  
37 help overcome these barriers.

38  
39 **Key words:** community health workers, community-orientated primary healthcare, South Africa

40  
41  
42 **INTRODUCTION**

43 In response to the call for universal health coverage (UHC), many low and middle-income countries  
44 (LMICs) are strengthening primary health care (PHC) services [1, 2]. Due to insufficient number of  
45 health workers, community health workers (CHW) are being deployed to provide health care services  
46 to under-served communities [3]. There is considerable evidence of the benefit of CHW programmes  
47 in LMICs, particularly relating to the delivery of maternal and child health services [4, 5]. CHW  
48 programmes need to be integrated with the community to be attuned to their needs, as well as  
49 integrated into the health services to be well-resourced and well supervised, and to communicate  
50 their community's needs to practitioners and decision makers. Over the years, there has been a  
51 growing interest in community orientated primary care (COPC). COPC is an approach to health service  
52 development and delivery that integrates public health and primary care to deliver targeted services  
53 to a defined community [6]. This approach recognises the roles of lay health workers, civil society,  
54 non-governmental organisations and government sectors in the planning, designing and delivery of  
55 primary health care.

56  
57 There are six key principles associated with the practice of COPC [5, 6]. Under COPC, there is a need  
58 to have a pre-defined community, utilise multidisciplinary approach to care, use evidence to

59 consistently evaluate and strengthen care, and the services need to be comprehensive and integrated  
60 into healthcare system and community structures (see Table 1) [5]. Some countries such as Bolivia and  
61 Brazil, have made attempts to implement CHW programmes with a community orientation and line  
62 with COPC principles. However, there are few evaluations of the effectiveness of these programmes  
63 [8] and often the initiatives do not embrace the complete COPC approach primary healthcare  
64 development and delivery [6]. In South Africa, a national CHW programme has been implemented as  
65 part of strengthening PHC, and in some areas, implementers have tried to ensure that the CHW  
66 programme has been implemented with a focus on the COPC principles.

67  
68

**Table 1: Six key principles of community orientated primary care**

| Principle                          | Definition                                                                                                                                                                                                                           |
|------------------------------------|--------------------------------------------------------------------------------------------------------------------------------------------------------------------------------------------------------------------------------------|
| A defined community                | There should be understanding of the geographical location of the community and existing resources (e.g., churches and police stations) (assessment of local needs and assets).                                                      |
| Multidisciplinary approach to care | A team of health professionals should work in partnership with staff from social services to diagnose and respond to community problems.                                                                                             |
| Evidence based care                | There should be consistent collection and use of community data to plan a service that will meet the community's needs                                                                                                               |
| Comprehensive care                 | The services package should provide care for a range of conditions, and where possible be comprehensive (e.g., promotive, preventative, curative and rehabilitation care)                                                            |
| Integration of care                | Health care and other social services should be provided in an integrated and continuous way.                                                                                                                                        |
| Community participation            | Community members should be involved in the assessment of problems and implementation of the interventions, and where feasible existing community resources should be used (e.g., employment of local people as lay health workers). |

69  
70

71 South Africa has a long history of COPC [9, 10]. In the 1940s, Drs Sydney and Emily Kark in Kwa-Zulu  
72 Natal province pioneered the first practice of COPC in Pholela Health Centre. Their multi-disciplinary  
73 approach to care consisted of clinicians, social services workers and lay health workers/ CHWs  
74 providing health care services to under-privileged communities. The model, though not widely  
75 implemented across the country, helped extend access to health care services. During the 1950s with  
76 the apartheid government, the COPC initiative came under increasing political and financial pressure  
77 which led to its demise in the 1960s [9].

78

79 Since the end of Apartheid and establishment of democracy in 1994, the provision of community-  
80 based health services has been led by non-government organizations (NGOs) in response to the  
81 HIV/AIDS and TB pandemics [11]. However, these NGO programmes were fragmented and single  
82 disease-focused, thus neglecting the other needs of individuals and families. In line with international  
83 UHC goals, in 2011, the South African Department of Health (DOH) introduced policies to strengthen  
84 PHC, and so to improve access to quality health care services [12]. A nation-wide CHW programme  
85 (locally known as ward-based outreach teams; WBOT) was introduced across all provinces, providing  
86 care for a more comprehensive range of health conditions [13].

87

88 The WBOTs comprise at least 6 CHWs, linked to a local PHC facility, serving a defined geographic area,  
89 providing a combination of promotive and preventative healthcare services to households, and  
90 making referrals to social services workers. The WBOT team is meant to be led by a nurse and  
91 supported by a health promoter and an environmental officer. In the last 10 years, Sedibeng, Tshwane  
92 and Johannesburg districts in Gauteng province have taken a COPC approach to implementing the  
93 CHW programme. More recently selected health districts in Western Cape and KwaZulu-Natal  
94 provinces have incorporated the COPC principles into their CHW programmes. [10, 14]. In this paper,  
95 we examine to what extent a nation-wide CHW programme is integrated into communities and  
96 implemented in accordance with the key COPC principles.

97

98

## 99 **METHODS**

### 100 Study design

101 Drawing on data collected as part of a larger CHW study [15] and doctoral research, we used a  
102 descriptive case study approach to examine seven CHW teams. The case study design enabled us to  
103 examine the practice of COPC in the context of the nation-wide CHW programme, CHWs relationship  
104 with the community and integration with the health system [16, 17].

105

106

107 Study sites

108 We studied seven CHW teams in Sedibeng, Johannesburg, Tshwane and Ehlanzeni districts of Gauteng  
109 and Mpumalanga provinces. These CHW teams and health districts were purposively selected based  
110 on their location, history and model of adopting the CHW programmes.

111

112 The Sedibeng and Johannesburg districts adopted the COPC approach prior to 2011. The Tshwane  
113 district introduced COPC with the introduction of the national CHW programme in 2011. The Ehlanzeni  
114 district had not fully implemented the new CHW programme, nor did the leaders of the programme  
115 specifically focus on COPC. However, it was included in the study as the programme had reputation of  
116 being well run; we also anticipated that the differences between urban or semi-urban, and rural sites  
117 would be important, particularly in trying to deliver a community orientated programme (Table 2).

118 **Table 2: Description of site, CHW programme and COPC practices**

| District  | Location   | WBOT programme                                 | Principles of COPC formally articulated by programme leaders |
|-----------|------------|------------------------------------------------|--------------------------------------------------------------|
| Sedibeng  | Peri-urban | Gvt programme; no additional funding           | Yes                                                          |
| JHB       | Urban      | Gvt programme with additional external funding | Yes                                                          |
| Tshwane   | Urban      | Gvt programme with additional external funding | Yes                                                          |
| Ehlanzeni | Rural      | Gvt funding but sub-contracted to local NGOs   | No                                                           |

119

120 Data collection

121 The data was collected by the first author, supported by a team of data collectors who were trained  
122 in PHC, community-based healthcare services, research methods and ethics. We conducted focus  
123 groups, observations, individual interviews and observations to gather data on the CHW programmes  
124 (see Table 3). The data collection instruments were in English, however where participants struggled  
125 to understand the questions or express themselves in English, the team provided clarity using local  
126 languages (Isizulu, Sesotho and Sepulana, an unofficial language spoke in some parts of Mpumalanga  
127 province). Data was collected data from September 2016 to April 2019.

128

129

130

131 **Table 3: Data collection methods and number of participants**

|                                               | Sedibeng |        | JHB    | Tshwane |        | Ehlanzeni |        | Total |
|-----------------------------------------------|----------|--------|--------|---------|--------|-----------|--------|-------|
|                                               | Team 1   | Team 2 | Team 3 | Team 4  | Team 5 | Team 6    | Team 7 |       |
| Focus group discussions with CHWs             | 1        | 1      | 2      | 2       | 2      | 1         | 1      | 9     |
| Observations with CHWs and their supervisors* | 24       | 16     | 19     | 7       | 5      | 10        | 17     | 98    |
| Interviews with CHW team                      | 4        | 4      | 3      | 2       | 1      | 1         | 2      | 17    |
| Interviews with community representatives     | -        | -      | 5      | 0       | 4      | 6         | 5      | 20    |
| Interviews with key informants                | 5        |        | 2      | 6       |        | 3         |        | 16    |

Note: \* Each observation was a full day spent observing 2 or 3 CHW who were working together

132  
133

134 *Focus group discussions*

135 The data collectors facilitated nine focus group discussions with the CHWs. Each FGD had  
136 approximately 10 participants, all women. Using a structured guide, we explored topics on the nature  
137 of their activities while out in the community, their experiences, successes and challenges while  
138 providing the services. Each of the discussions was audio-recorded and lasted approximately 2hrs and  
139 was facilitated by the first author while data collectors helped take additional notes relating to the  
140 discussion.

141

142 *Observations*

143 We designed observation templates and refined them using role-plays involving the data collectors.  
144 At each site, the data collectors observed a pair of CHWs for a period of 3 days. The CHWs were  
145 observed during household visits and fieldworkers documented the services they provided and  
146 engagements with patients while in the field. Some of the observed visits were supervised by outreach  
147 team leaders. However, in Ehlanzeni sites, the team leaders were not observed with CHWs, as the  
148 supervisors did not go to the households with the CHWs due to transport issues. The data collectors  
149 asked the household members for permission before carrying out the observations of the CHWs.

150

151 *Interviews*

152 We conducted 17 semi-structured interviews with facility managers, CHW team leaders and  
153 community representatives. These participants were purposively selected based on their knowledge

154 and experience of the CHW programmes in the different sites. We asked the CHW about their duties  
155 in the households, their relationship with healthcare system and community structures. We asked the  
156 supervisors and community representatives about the support they provide to the CHWs, the role  
157 they played in the community, successes and challenges of the programme. Each interview lasted  
158 approximately 45mins and were audio recorded with participant consent.

159

#### 160 *Key informant interviews*

161 Using snowball sampling technique, 16 key informants drawn from Sedibeng, Johannesburg and  
162 Tshwane districts were recruited to participate in the study. Participants were drawn from districts  
163 department of health, local municipalities and institutions of higher learning. We asked questions  
164 about the origins of the programme, the practice of community-based health care, and the challenges  
165 the participants faced in rolling out the programmes.

166

#### 167 Data analysis

168 Following thematic content analysis method [18], the first author used a MS word sheet to extract  
169 data from the interview transcripts and observation notes, to bring together the data from each of  
170 the seven study sites; data was summarised while retaining important quotations. The author  
171 regularly presented the extracted data to the co-authors; this was done to ensure completeness of  
172 the data and that all relevant information was being extracted. Once data extraction was complete,  
173 we developed a coding system that focused on the nature of community-based health care services,  
174 evidence of COPC principles in the services provided by the CHW teams, the challenges they encounter  
175 in the different sites, their engagement with the communities and healthcare systems. Emerging  
176 themes were grouped together per team and synthesized for similarity and differences. The coded  
177 data was synthesized to understand to what extent the CHW programmes are integrated into  
178 communities and implemented in accordance with the key COPC principles.

179

#### 180 Ethics approval and participant consent

181 The larger project was cleared by the University of the Witwatersrand Medical Ethics Committee  
182 (M160354) and the Sedibeng health district. The doctoral study also received ethical clearance  
183 (M180140) from the same university ethics body, the Johannesburg, Tshwane and Ehlanzeni provincial  
184 government research authorities. The participants also provided written informed consent before  
185 they could participate in the study.

186

## 187 **FINDINGS**

188 In this section, we describe the history and implementation of CHW programmes in the different sites.  
189 We then identify and describe evidence of the extent of community orientation of the programme,  
190 using COPC principles.

191

### 192 **THE CHW PROGRAMMES AND THE COMMUNITIES THEY SERVE**

#### 193 Sedibeng

194 Due to increasing cases of chronic diseases and shortage of health workers to provide health care, a  
195 CHW programme was introduced in 2010. Through the assistance of local gatekeepers (i.e., political  
196 leaders), health posts (HPs; temporary wooden structures) were introduced in one of the more  
197 densely populated areas of Sedibeng district. Nurses and lay health workers (CHWs), selected from  
198 local primary health facilities and NGOs respectively, were recruited to work on the programme. The  
199 CHWs received training from a team of family medicine specialists to undertake a community  
200 diagnosis, involving the collection of individual and household data (e.g., number of householders,  
201 income, access to social assistance, self-reported illness etc.), to identify health, social and economic  
202 needs.

203 An unpublished evaluation by members of Sedibeng health team indicated an increase in the number  
204 of identified TB, hypertension and child malnutrition cases. However, with the introduction of the  
205 nation-wide CHW programme in 2011, the programme was experiencing challenges, as funds and  
206 other institutional resources were diverted to the nation-wide CHW programme.



207 At the time of the study, Team 1 operated in an informal settlement, shacks made from corrugated  
208 iron and plastic, were home to local South Africans and immigrants. Access to running water,  
209 sanitation and electricity was limited. The residents relied on water taps installed in central points of  
210 the community. The CHW teams were operating from both HPs and PHC facilities and led by either  
211 junior or retired senior nurses. The CHWs provided range of promotive and preventative services  
212 including delivering chronic medication to pensioners, in under-served communities located in  
213 townships and informal settlements. The CHWs, using standardized forms, undertook household  
214 registration, contact tracing and made referrals to local PHC facilities. However, the CHWs stored the  
215 forms in their homes and the information wasn't used to inform the type of care provided to the  
216 households.

217  
218 Johannesburg

219 In Johannesburg, community orientated care was introduced by family medicine practitioners in one  
220 community health centre. Similar to the Sedibeng team, there were community consultations to gain  
221 permission to work in the community. The catchment area was mapped, and community interviews  
222 carried out by CHWs to understand community needs. The team registered 22,000 households. All the  
223 registered householders were told about the community practice e.g what it intend to achieve and  
224 how they will benefit. Patient care was provided by a medical doctor, clinical associate, nurse and a  
225 team of eleven CHWs recruited for the purpose of the intervention. The services were limited to the  
226 individuals registered under the community practice.

227 After several years, the initiative stalled as external funding had come to an end. Some of the CHWs  
228 were absorbed into the national CHW programme. This resulted in conflicts between the CHWs and  
229 programme leaders, as their integration into the national programme meant a reduction in their  
230 monthly stipend. At the time of the study, no evaluations had been published on the outcome of the  
231 intervention; anecdotal evidence suggested an improvement in chronic care management.

232 This team worked in a diverse area with formal brick housing, hostels (originally built for working  
233 miners, but now occupied by families), as well as informal settlements. Communities with formal  
234 housing tended to have access to running water and electricity and were relatively affluent; the  
235 hostels and informal settlements were not. High levels of crime made it difficult for the CHWs to  
236 adequately provide care. A CHW commented “Many criminals live in this hostel. We are always scared  
237 when walking in this area. It is worse because we have to enter the households and provide care”  
238 (CHW, FGD, Team 3). The CHWs preferred to visit their hostel clients in groups, however, this was not  
239 always possible; to reach their allocated number of patients they had to split up.

#### 240 Tshwane

241 COPC was first introduced in Tshwane as part of local government health services, with a group family  
242 medicine practitioners and researchers leading the initiative. In 2011, the initiative became part of the  
243 nation-wide CHW programmes with external funding. Similar to the Sedibeng district, in Tshwane local  
244 schools and churches were used as health posts, particularly in areas where there were few PHC  
245 facilities. In rolling out programme, the CHWs mapped the community and undertook a community  
246 diagnosis. The CHWs were equipped with phones with a specifically designed app to gather household  
247 and individual data. Data from CHWs’ phones was aggregated by the supervisor and programme  
248 leaders for supervision and in-service training purposes.

249 The programme implementation relied on the CHWs employed by the Department of Health, as part  
250 of the nation-wide CHW programme. The CHWs had only been offered 10-day training by the  
251 Department and the majority had low literacy levels. The low stipend, lack of working tools and low  
252 literacy levels led to a conflict between the CHWs and the Department of Health, and meant the CHWs  
253 were often unreliable pool of community workers. Similar to the other health districts that had  
254 attempted to implement community-based health services in accordance with COPC principles,  
255 implementation of the programme weakened when external funding came to an end.

256 The two teams were providing services to residents in informal settlement, RDP and formal brick  
257 housing. The informal settlements were without running water or electricity, and the majority of the

258 residents were unemployed. In some part of the community, there was sewage in the streets making  
259 the area inaccessible by foot and motor vehicle. The CHWs prioritized providing care to patients  
260 located in the informal settlements, as many of them were not adhering to their chronic medication.  
261 Ensuring patients took their medication as prescribed required frequent visits (Field observation  
262 notes, Team 4).

### 263 Ehlanzeni

264 The national CHW programme was introduced in the district in 2011. CHWs, who remained in the  
265 employment of the NGOs, were selected to work on the new programme. Their monthly stipend was  
266 paid by the provincial Department of Health via the NGO. The two CHW teams were overseen by  
267 senior professional nurses based in the local PHC facilities; the CHW also reported to program  
268 managers attached to the NGOs. The CHWs undertook a combination health promotion and  
269 preventative roles in the surrounding rural communities. While the CHWs had prior work experience  
270 in providing home-based care services, none of the CHWs had received CHW training prior to being  
271 inducted into the CHW programmes. The appointed supervisors were unable to provide field support  
272 to the CHWs due to lack of transport to accompany the CHWs while visiting households. The  
273 supervisors spent most of their time in the facility attending to patients.

274 In the community, many households had an unreliable water supply (Team 7). The majority of the  
275 residents didn't have water boreholes and had to use wheelbarrows loaded with 20 liters containers  
276 to ferry water from households with boreholes. The area had poor roads, inaccessible by a car.  
277 Pensioners often struggled to visit the healthcare facility, as they could not walk or get a lift  
278 (Observation notes, Team 6). The CHWs complained about the hindrance of local traditional beliefs in  
279 their efforts to provide care. For example, during household visits, the researchers observed a diabetic  
280 pensioner with a wound on her foot refusing CHW care; she believed her neighbour was the cause of  
281 her poor health and misfortune (Observation notes, Team 6). As local women, the CHWs had to  
282 compromise and accommodate the patient beliefs.

### 283 **COMMUNITY ORIENTATION OF THE CHW PROGRAMMES**

284 The CHW programmes demonstrated different degrees of the key features of community-orientated  
285 primary health care (i.e., analysis of local health needs and assets, use of evidence, service integration,  
286 comprehensive care and multi-disciplinary approach to care, and community participation).

287 *Assessment of local needs and assets and use of evidence*

288 The Tshwane, Sedibeng and Johannesburg teams gathered data to understand the local context and  
289 health needs. CHWs visited households to learn about their perceived needs. Key informant in  
290 Sedibeng commented: *“The community participated by identifying its needs, the needs identified by  
291 the community were then moderated to come up with a list of urgent needs to be addressed”* (KI,  
292 interview, Sedibeng). Undertaking a community diagnosis also allowed the implementing teams to  
293 explain the programme to the community and involve the community. The data generated through  
294 this process was collated and used to inform the human resources and service requirements for the  
295 intervention.

296

297 Across the different sites, there was evidence of continuous data collection to inform service delivery.  
298 In Tshwane district, as mentioned above, a mobile app was installed in phones given to CHWs to  
299 records householders’ health needs, care provided and schedule follow-up visits. However, due to  
300 limited funding, the use of mobile health technology could not be sustained, as lost and  
301 malfunctioning tablets were not replaced or repaired. A key informant commented: *“unfortunately, if  
302 a technology device is used every day, those devices last for about 2 years. Therefore, you need to  
303 budget for a 2-year replacement cycle. Otherwise, it doesn’t really work”* (KI, Interview, Tshwane).

304

305 In the other districts, there was no use of mobile technology. Instead, household information is  
306 recorded on paper, often filed at the CHW homes, and not used to help inform future interventions in  
307 the community. However, some of the informants were concerned that under the national CHW  
308 programme the use of evidence to guide practice is diminishing. A key informant in Sedibeng  
309 commented: *“..... WBOT asks you questions regarding your needs, but only God knows for what,*

310 *because I haven't seen anyone acting on the collected data... WBOT is designed not to have impact on*  
311 *the health of the people"* (KI, Interview, Sedibeng).

### 312 Service integration

313 To assess CHWs connection with the health system, we examined four features of the programmes -  
314 distance/ location from the clinic, supervision, relationships with health workers and referral systems.

#### 315 *Distance / location*

316 In the rural setting, many villages were located far from health facilities. To reduce the time spent  
317 walking between their homes, the health facility and the community, the CHW were advised to only  
318 report to the facility on Fridays to compile their weekly reports. On the other days of the week, they  
319 went straight from their homes to visit households: *"They realized some of us come from far places,*  
320 *so coming to the clinic just to sign in and later go back to the households was impractical."* (CHW, FGD,  
321 Team 7). Though this change helped save the CHWs time, it reduced their access to supervision from  
322 the facility-based nurses. In contrast, in urban sites, the catchment areas were conveniently located  
323 closer to the health facilities, and although supervisors lacked transport, they were able to walk or  
324 used their own cars.

#### 325 *Supervision*

326 When CHW teams were led by senior nurses who provided thorough supervision, the CHW were more  
327 competent, likely to receive support from the facility and be respected by the community. More  
328 skilled, senior supervisors discussed complex cases with CHW (e.g., patients refusing care and not  
329 adhering to treatment) and where necessary accompanied the CHW to see the patient. However, this  
330 was not the case in the rural teams, where, although the supervisors were senior nurses, it was not  
331 possible for them to invest sufficient time and resources in the supervision of the CHWs. The CHWs in  
332 Ehlanzeni were without a supervisor for a prolonged period during data collection. *"we have not had*  
333 *a supervisor since October last year... when we have problems we tell the facility manager who make*  
334 *time to assist us"* (CHW, FGD, Team 6). During data collection, the supervisor was appointed and  
335 undergoing induction by the employer. The other supervisor in Team 7 only saw the CHWs when they

336 reported to the facility on Fridays; during the week she didn't have a vehicle to visit households. The  
337 CHWs were allowed to call the supervisor to discuss issues they encountered. However, this was  
338 impractical as they were not provided with airtime and couldn't afford buying airtime for work  
339 purposes. The contracting NGO was also not providing daily supervision to the CHWs.

340

#### 341 *Relationships with health care workers*

342 The CHWs in Team 2, led by a senior supervisor, received sufficient support from facility-based staff  
343 members, as the supervisor negotiated for their inclusion in facility activities and borrowed equipment  
344 (e.g., blood pressure machines) on their behalf. In order to build a good relationship with clinic staff,  
345 the supervisors in Johannesburg helped the nurses in the clinic: *"to ensure the patients referred by my*  
346 *people (CHWs) are attended timeously, I make time to assist the nurses in the clinic. I sometimes assist*  
347 *X in the triage room or attend women who are visiting the clinic for family planning services"* (CHW  
348 supervisor, interview, Team 3). However, support for CHWs planned activities was not forthcoming:  
349 *"I usually go to the facility manager's office and inform her that I am having a campaign based on HIV,*  
350 *TB, vitamin A or de-worming. She will be happy but there will be no assistance, even if I can ask for*  
351 *assistance from the EPI or TB side. They will say, you are independent, you must know these things"*  
352 (CHW supervisor, interview, Team 5).

353 In the rural sites, when the CHW were at the clinic, they used a separate building, not the main clinic;  
354 this arrangement isolated the CHWs from the rest of the facility staff members. The team leaders also  
355 spent less time with the CHWs, as they were always overwhelmed by patients seeking care at the  
356 facility.

357 In the urban sites, the CHWs had a complex work relationship with facility-based health workers. In  
358 one of the facilities, nurses used degrading names to refer to the CHW. A CHW commented: *"they call*  
359 *us names like "mamoroto" [someone who is working with urine]... They always chase us around saying*  
360 *we must go to the side where patients' urine is collected"* (CHW, FGD, Team 5). This degrading name

361 was conceived from the CHWs role in the collection of patients' urine as part of their duties within the  
362 facility.

363

#### 364 *Referral systems*

365 CHWs refer cases they cannot resolve at household level to health facilities for further assessment  
366 and care. A referral requires cooperation between the CHWs and facility staff (i.e., nurses providing  
367 feedback to the CHWs). However, due to CHWs "inferior" status, some nurses did not complete the  
368 back referrals, thus hindering CHWs from providing care post referral. A CHW commented: "*we*  
369 *always have to beg to receive the report about the patients that we referred to the clinic*". Another  
370 CHW added: "*getting the completed back referral form from the nurses is never easy, I always have to*  
371 *ask my supervisor to get the form from the clinic staff*" (CHW, FGD, Team 1). These issues were more  
372 common in teams where the CHWs did not have a senior or present supervisor to mediate between  
373 them and facility staff.

374

#### 375 *Comprehensive and multi-disciplinary approach to care*

376 In the urban sites, the CHWs received expert advice and mentorship from clinicians and social services  
377 professionals in order to provide health promotion, prevention, screening services and referral for a  
378 wide range of health conditions. In Tshwane district, the CHWs met with members of a multi-  
379 disciplinary team weekly to debrief and receive case guidance. A key informant commented: "*Last*  
380 *week, I attended a meeting in the X clinic where the CHWs and OTL had a review meeting. The multi-*  
381 *disciplinary team consisting of a dietician, doctors, nurses and so forth attended the meeting. They*  
382 *reviewed the difficult cases and advised the CHWs accordingly*" (KI, interview, Tshwane). Similarly, the  
383 Sedibeng and Johannesburg teams had the support of doctors, nurses and clinical associates. The  
384 multi-disciplinary approach benefited the CHWs, as they had access to clinical knowledge shared  
385 during the meetings.

386 However, there were concerns that the CHWs did not possess the knowledge and skills required to  
387 implement support interventions aligned to COPC. A key informant in Tshwane district commented:  
388 *“you cannot expect people who are at that level of training, who are not managed properly and*  
389 *without team leaders to function well”*. To overcome this challenge, for example, the Johannesburg  
390 team used external funds to employ, train and retain CHWs with desired knowledge and skills mix. In  
391 Sedibeng, the CHWs experienced numerous challenges when offering services to those without  
392 residency status: *“Working in this community is never easy for us. The CHWs do visit the householders*  
393 *to provide services, however some the householders do not have identity documents needed to register*  
394 *them for social services”* (Community Representative, interview, Team 1). The CHWs reported these  
395 cases to their senior team leaders who couldn’t assist as they did not go to the fields with them to  
396 offer onsite supervision.

397 The identification of unmet need also appeared to present challenges for the healthcare system. The  
398 Sedibeng team found suspected cases of cervical cancer, and those who needed cataract operations.  
399 However, care for such conditions was only available at distant, tertiary hospitals, and required  
400 numerous visits, which were often not affordable for residents. As a result, some of the participants  
401 deemed the attempt at COPC informed intervention as ineffective, as the identification of community  
402 health needs was not matched with available care.

#### 403 Community participation

404 As mentioned above, each programme consulted local stakeholders such as political and traditional  
405 leaders, school managers and local NGOs. In Tshwane, the team worked with local stakeholders to  
406 secure space in their schools and churches to be used as health posts. A participant commented: *“After*  
407 *we have introduced and involved the community in our work, implementation went well. The ward*  
408 *councillor even helped us to find a suitable space to use as a health post”* (KI, interview, Tshwane).  
409 Another participant added: *“Since we informed them about our programme. We were protected,*  
410 *nothing bad has happened to us because the community knows us. If I complain that somebody*  
411 *snatched my phone, they will make sure that they will get whoever took it”* (KI, interview, Tshwane).



412 In Johannesburg at the start of the programme, there was resistance from patients and community,  
413 but continuous engagement led by a community liaison officer who was employed to support the  
414 programme helped ease the tension between the health team and community. Similarly, in Sedibeng  
415 (Team 1), local leaders upon realizing patients visiting the health post queued in the sun or cold  
416 weather, volunteered their time to build a temporary shelter for the patients to use while waiting for  
417 their turn.

418 In Sedibeng, when the CHW team 1 struggled to persuade patients to visit the local health facility for  
419 further health assessment and treatment, community leaders made time to meet and listen to the  
420 CHWs problems (e.g., patients refusing CHWs entry into their households), and addressed the issues  
421 with the householders. In the different sites, the CHWs also struggled to access some households to  
422 provide care due to the stigma associated with their services. Due to their previous role during the  
423 height of the HIV pandemic, their service was associated with providing HIV and TB care. A CHW  
424 commented: “..the clinic sometimes send us to clients who are defaulting on their medication, but  
425 because they [clients] don’t want to be seen being visited by us, they chase us away” (CHW, FGD,  
426 Team 3).

427 Furthermore, in Ehlanzeni Team 6, a community representative who also served as a member of the  
428 clinic committee ensured the clinic was always represented during community meetings she  
429 addressed. This leader’s initiative helped ensure service delivery and health concerns of the residents  
430 were discussed in the same platform. However, community members were only interested in topics  
431 such as access to employment, water and decent housing. Many of the communities were politically  
432 volatile, with residents were regularly protesting for decent housing and running water. These on-  
433 going service delivery protests often disrupted the engagements between the health team and  
434 community: “*We often have to stop work, because of service delivery protests*” (KI, Tshwane).

## 435 **DISCUSSION**

436 In our study, we explored the community orientation of the national CHW programme in different  
437 sites. There was some evidence of resistance by community members to participate in the design and

438 implementation of the health programmes, as the residents were more interested in housing than  
439 healthcare. Also, CHWs insufficient health knowledge and skills contributed to the ineffectiveness of  
440 the programmes, particularly were the CHWs did not have access to a senior team leader to provide  
441 them with supervision and mentorship. However, the multidisciplinary approach to care which saw  
442 medical doctors providing in-service training to CHWs in some sites, improving the services provided  
443 to patients. As much as there was an attempt to implement the programmes in accordance with COPC  
444 principles, dysfunctional mobile phones for patient data collection, volatile communities and an  
445 unsupportive healthcare system limited the effectiveness of the programmes to deliver care. The CHW  
446 teams had to navigate these issues to deliver healthcare to residents.

447

448 Studies have shown the delivery of community orientated health care requires well-structured  
449 support from healthcare systems [20]. A review in low and middle income countries has found many  
450 lay health workers did not possess the training and knowledge to provide maternal and child health  
451 services, however with continuous clinical support they were able to acquire the knowledge and learn  
452 skills to provide quality care [21]. A study in Brazil found community health agents who worked as part  
453 of a local family healthcare team, which included doctors and dentists, to be sufficiently supported  
454 due to their integration into healthcare systems and community structures [22]. In our study, some  
455 programme leaders organised in-service training opportunities for the CHWs to enable them to  
456 provide comprehensive care to their clients. However, in our rural sites, contextual factors such as  
457 distance and lack of transport often limited the availability of supervision, the CHWs functioned  
458 without field supervision. The CHWs who hardly interacted with facility-based workers received less  
459 support in their daily functions. The unavailability of senior team members in some sites meant  
460 conflicts the CHWs with members of staff were left unresolved.

461

462 CHW programmes can fail due to over-reliance on external funds to set up and implement the  
463 programme [5, 6, 18]. For example, in Kenya and Brazil, initiatives stalled when donor funds ran out,  
464 and the national governments did not make funds available to continue the initiatives [6,18]. In our

465 study, the COPC initiatives studied relied heavily on external resources to recruit, train and retain the  
466 CHWs, and unfortunately, when the funds ran out the initiatives stalled. Many of those writing about  
467 community-based programme argue sustainable initiatives require financial commitment from  
468 government [23].

469 World Health Organisation guidelines states communities have a significant role to play in CHW  
470 selection, programme implementation, supervision and performance evaluation [2,19]. However, a  
471 review of CHW programmes has shown communities are poorly involved in setting up health  
472 programmes, mainly due to external forces which include pressure from donors and technical advisors  
473 to achieve quick results, thereby bypassing the slow social processes required to establish stronger  
474 ties between the CHWs and communities [20]. In our study sites, the communities were not involved  
475 in CHW selection, programme implementation, supervision or evaluation. The efforts of programme  
476 leaders to consult with community members were not met with the same energy. The majority of  
477 communities had housing issues, and as a result were less invested in health programmes. The  
478 implementing teams had to navigate the community unresponsiveness while delivery healthcare  
479 services.

480 In response to the limitations of CHW programmes, Schneider and Lehmann propose efforts be  
481 directed to develop community health systems [6,7]. The current organisation of CHW programmes  
482 are ineffective as they are narrowly focused using CHWs as key drivers of health service delivery. Other  
483 sets of actors and systems within the community, that can be tapped into and positioned to improve  
484 the delivery and uptake of health services, are being neglected and underutilised [6]. In their work on  
485 community health systems, Schneider et al recognise the role of non-government organisations, civil  
486 society and government sectors (e.g education and social development) in designing and delivering  
487 care. Noting countries under investment in CHW programmes, the scholars recommend governments  
488 allocate sufficient resources to the health sector for training, supervision, reliable supplies, improved  
489 data systems and integration of the programmes into health systems and community structures [7].

490 The limitations of our study were, first, the CHWs and their supervisors, and the key informants may  
491 have provided socially desirable answers in favour of their unique COPC initiatives. To mitigate this,  
492 data was collected from different participants located in the different levels of the healthcare systems  
493 (e.g. program directors vs. CHWs). This approach allowed us to obtain multiple perspectives of the  
494 initiatives and triangulate the data. The study also demonstrated some key strengths. As far as we are  
495 aware, there are limited studies locally that explored the practice of COPC and inherent tension with  
496 the nation-wide programmes. Existing literature studies the COPC programmes in isolation [10, 24,  
497 25], thus missing the opportunity to highlight the key design features that can be used to strengthen  
498 primary health care.

#### 499 **CONCLUSION**

500 The implementation of community orientated primary health care services is crucial in a resource  
501 constrained setting like South Africa. However, the implementation of these programmes often get  
502 derailed by socio-economic issues dominant in the communities, limited funding and lack of support  
503 supervision for the outreach teams. For the sustainability of these programmes, governments need to  
504 make support (e.g. funding and supervision) available to the implementing teams.

#### 505 **ABBREVIATIONS**

506 **CHW:** Community health worker

507 **CRI:** Community representative interview

508 **COPC:** community-orientated primary healthcare

509 **FGD:** Focus Group Discussion

510 **NGO:** Non-Government Organization

511 **KI:** Key informant

512 **LMIC:** Low- and Middle-Income Country

513 **PHC:** Primary health care

514 **UHC:** Universal Health Care

515 **WHO:** World Health Organization

516 Data availability statement

517 Dataset is available on a reasonable request. Given the difficulties of anonymising qualitative data, we  
518 will work with researchers wishing to further analyse the data. The request to access the dataset can  
519 be directed to Mr Hlologelo Malatji, email: [hlole.malatji@gmail.com](mailto:hlole.malatji@gmail.com) or Prof Jane Goudge, email:  
520 [jane.goudge@gmail.com](mailto:jane.goudge@gmail.com)

521

522 Acknowledgements

523 The authors would like to thank the following individuals for their invaluable contribution: the data  
524 collectors, key informants, CHWs and their supervisors, health facility staff members and community  
525 representatives. The support of the Sedibeng Health District management, in particular the former  
526 district director Mrs. Salamina Hlahane and community-based services coordinator Mrs. Bridget  
527 Lefhoedi is highly appreciated.

528

529 The authors would also like to thank these organisations for their generous support: Sedibeng,  
530 Johannesburg, Tshwane and Ehlanzeni Health Districts, and the UK Medical Research Council (MRC).

531

532 **REFERENCES**

- 533 1. Hone, T., J. Macinko, and C. Millett, *Revisiting Alma-Ata: what is the role of primary health*  
534 *care in achieving the Sustainable Development Goals?* Lancet, 2018. **392**(10156): p. 1461-  
535 1472.
- 536 2. Lehmann, U., N.A.Y. Twum-Danso, and J. Nyoni, *Towards universal health coverage: what are*  
537 *the system requirements for effective large-scale community health worker programmes?* BMJ  
538 Glob Health, 2019. **4**(Suppl 9): p. e001046.
- 539 3. Hartzler, A.L., et al., *Roles and Functions of Community Health Workers in Primary Care.* Ann  
540 Fam Med, 2018. **16**(3): p. 240-245.
- 541 4. le Roux, K.W., et al., *Community health workers impact on maternal and child health outcomes*  
542 *in rural South Africa - a non-randomized two-group comparison study.* 2020. **20**(1): p. 1404.

- 543 5. Wilford, A., et al., *Exploring the care provided to mothers and children by community health*  
544 *workers in South Africa: missed opportunities to provide comprehensive care.* BMC Public  
545 Health, 2018. **18**(1): p. 171.
- 546 6. Schneider, H. and U. Lehmann, *From community health workers to community health systems:*  
547 *time to widen the horizon?* Health Systems & Reform, 2016. **2**(2): p. 112-118.
- 548 7. Zambruni, J.P., et al., *Community health systems: allowing community health workers to*  
549 *emerge from the shadows.* The Lancet Global Health, 2017. **5**(9): p. e866-e867.
- 550 8. Bastos, M.L., et al., *The impact of the Brazilian family health strategy on selected primary care*  
551 *sensitive conditions: A systematic review.* PLoS One, 2017. **12**(8): p. e0182336.
- 552 9. Tollman, S. and I. Friedman, *Community-orientated primary health care--South African legacy.*  
553 S Afr Med J, 1994. **84**(10): p. 646.
- 554 10. Mash, R., et al., *A framework for implementation of community-orientated primary care in the*  
555 *Metro Health Services, Cape Town, South Africa.* Afr J Prim Health Care Fam Med, 2020. **12**(1):  
556 p. e1-e5.
- 557 11. Schneider, H., et al., *The challenges of reshaping disease specific and care oriented community*  
558 *based services towards comprehensive goals: a situation appraisal in the Western Cape*  
559 *Province, South Africa.* BMC Health Serv Res, 2015. **15**: p. 436.
- 560 12. Mofolo, N., C. Heunis, and G.N. Kigozi, *Towards national health insurance: Alignment of*  
561 *strategic human resources in South Africa.* Afr J Prim Health Care Fam Med, 2019. **11**(1): p. e1-  
562 e7.
- 563 13. Mhlongo, E.M., E. Lutge, and L. Adepeju, *The roles, responsibilities and perceptions of*  
564 *community health workers and ward-based primary health care outreach teams: a scoping*  
565 *review.* Glob Health Action, 2020. **13**(1): p. 1806526.
- 566 14. Honiball, N.M. and T.S. Marcus, *The use and value of maps in Community-Oriented Primary*  
567 *Care: Does process matter?* Afr J Prim Health Care Fam Med, 2020. **12**(1): p. e1-e9.
- 568 15. Tseng, Y.H., et al., *Integrating community health workers into the formal health system to*  
569 *improve performance: a qualitative study on the role of on-site supervision in the South African*  
570 *programme.* BMJ Open, 2019. **9**(2): p. e022186.
- 571 16. Sjoberg, G., et al., *The case study approach in social research.* 1991). A case for case study,  
572 1991: p. 27-79.
- 573 17. Crowe, S., et al., *The case study approach.* BMC medical research methodology, 2011. **11**(1):  
574 p. 1-9.
- 575 18. Braun, V. and V. Clarke, *Thematic analysis.* 2012.
- 576 19. Cometto, G., et al., *Health policy and system support to optimise community health worker*  
577 *programmes: an abridged WHO guideline.* Lancet Glob Health, 2018. **6**(12): p. e1397-e1404.
- 578 20. LeBan, K. and M. Kok, *Community health workers at the dawn of a new era: 9. CHWs'*  
579 *relationships with the health system and communities.* 2021. **19**(Suppl 3): p. 116.
- 580 21. Ballard, M. and P. Montgomery, *Systematic review of interventions for improving the*  
581 *performance of community health workers in low-income and middle-income countries.* BMJ  
582 Open, 2017. **7**(10): p. e014216.
- 583 22. Avila, M.M., [A case study of the Community Health Agents Program in Uruburetama, Ceará  
584 (Brazil)]. Cien Saude Colet, 2011. **16**(1): p. 349-60.
- 585 23. Mash, B., et al., *Community-orientated primary care: a scoping review of different models, and*  
586 *their effectiveness and feasibility in sub-Saharan Africa.* BMJ Glob Health, 2019. **4**(Suppl 8): p.  
587 e001489.
- 588 24. Kioko, P.M., et al., *HIV stigma in Kenya: A family medicine led community orientated primary*  
589 *care approach.* Afr J Prim Health Care Fam Med, 2021. **13**(1): p. e1-e3.
- 590 25. Nelligan, I.J., et al., *An assessment of implementation of Community Oriented Primary Care in*  
591 *Kenyan family medicine postgraduate medical education programmes.* Afr J Prim Health Care  
592 Fam Med, 2016. **8**(1): p. e1-e4.

593
